# Supplementary material for: Laser capture microdissection and native mass spectrometry for spatially-resolved analysis of intact protein assemblies in tissue
Source: Royal Society of Chemistry journal article supplement (doi:10.1039/d3sc04933g), 2024-01-01
Supplement: d3sc04933g1.pdf [file d3sc04933g1.pdf]

Supporting Information for:

# Laser capture microdissection and native mass spectrometry for spatially-resolved analysis of intact protein assemblies in tissue

James W. Hughes, Emma K. Sisley, Oliver J. Hale, and Helen J. Cooper

School of Biosciences, University of Birmingham, Edgbaston, Birmingham B15 2TT, UK.

## Table of contents

### Experimental details

**Table S1:** Haematoxylin and eosin staining procedure

**Figure S1:** Representative mass spectra from LCMD extractions

**Table S2:** Proteins identified following top-down fragmentation from LCMD extractions of rat liver

**Figure S2:** Comparison of a nano-DESI mass spectrum and an LCMD-extracted mass spectrum

**Figure S3:** Identification of the RidA trimer

**Table S3:** Sequence ions observed for the RIDA monomer

**Figure S4:** Identification of SOD1 dimer

**Table S4:** Sequence ions observed for the SOD1 monomer

**Figure S5:** Identification of Zn-bound CA3

**Table S5:** Sequence ions observed for the CA3 Zn<sup>2+</sup> complex from a 0.04 mm<sup>2</sup> ROI

**Table S6:** Sequence ions observed for the CA3 Zn<sup>2+</sup> complex from a 0.01 mm<sup>2</sup> ROI

**Figure S6:** Identification of FABP1

**Table S7:** Sequence ions observed for FABP1

**Figure S7:** Identification of proteoforms of PPIA

**Table S8:** Sequence ions observed for unmodified PPIA

**Table S9:** Sequence ions observed for N-acetylated PPIA

**Figure S8:** Identification of MUP

**Table S10:** Sequence ions observed for MUP

**Figure S9:** Identification of regucalcin (RGN)

**Table S11:** Sequence ions observed for RGN

**Figure S10:** Mass spectrum of proteins >100 kDa from rat liver

**Figure S11:** PTMR mass spectrum of LDHA monomer

**Figure S12:** Optical images of rat brain cerebellum before and after LCMD sampling

**Figure S13:** Identification of ANP32A

**Table S12:** Sequence ions observed for ANP32A

**Figure S14:** Identification of PTMA

**Table S13:** Sequence ions observed for PTMA

## Experimental Details

### Materials

MS grade water was purchased from Fisher Scientific (Loughborough, UK). HPLC grade ammonium acetate was purchased from J.T. Baker (Deventer, Netherlands). Calibration solutions were purchased from Thermo Fisher Scientific (San Jose, CA). The solvent system used for capture of LCMD material and for subsequent electrospray was 200 mM aqueous ammonium acetate. For analysis of >100 kDa proteins, detergent (C8E4) was added to the extraction solvent after LCMD extraction at 0.5x its critical micelle concentration. Nitrogen (>99.995 %) and helium (>99.996%) gases used within the mass spectrometer were obtained from BOC (Guilford, UK). Harris hematoxylin, acid alcohol, industrial denatured alcohol, Scott's tap water substitute, xylene, and eosin (1% aqueous) were purchased from pfm Medical (Cheshire, UK). DPX was purchased from Cellpath (Powys, UK).

### Animal Tissues

Vehicle-dosed (0.5% HPMC and 0.1% Tween 80 in water) liver and brain tissue from adult male Hans Wistar rats was the kind gift of Prof Richard Goodwin. The animal was euthanised 2 h post dose and dissection was performed by trained AstraZeneca staff (project licence PP77366793, procedure number 3). All procedures were conducted in accordance with the United Kingdom Animal (Scientific Procedures) Act 1986, approved by institutional ethical review committee (Babraham Institute Animal Welfare and Ethical Review Board) and conducted under Project Licence authority. The liver and brain were snap frozen in isopentane over dry ice. All tissues were stored at -80 °C. Sectioning was performed at -22 °C on a CM1520 cryotome (Leica Microsystems, Wetzlar, Germany) and the 10 µm tissue sections were thaw mounted on to clean glass microscope slides. Slide mounted tissue was stored in a -80 °C freezer until use. Tissue washing and other sample preparation techniques were not employed to prevent delocalisation of the analytes. Tissue was allowed to thaw and dry in a vacuum desiccator for at least 15 minutes before LCMD to prevent the development of condensation on the tissue surface.

### Laser capture microdissection (LCMD)

LCMD was performed with a Zeiss PALM MicroBeam (Carl Zeiss Microscopy, Jena, Germany). The slide-mounted tissue was loaded into the LCMD sample plate. A 20x magnification was used for all LCMD experiments. A region of interest was defined either using a fixed geometry shape or drawn freehand around desired features. All regions of interest (ROI) were first cut out to provide an outline and a cut edge between the bulk tissue and the ROI. Once a region was cut out, the collection tube with ~10 µL of 200 mM ammonium acetate as the collection droplet was repositioned over the tissue and a new ROI was superimposed over the previous using the AUTOLPC cutting function which provides the catapulting laser pulse. The laser energies used were optimised each time such that the minimum energy required to lift the tissue from the slide was used. Collected samples were spun in a benchtop centrifuge for ~ 1-2 s to transfer the extraction solution from the cap of the microcentrifuge tube to the base of the tube to prevent potential sample loss when opening the cap.

### Electrospray ionisation

Nano-ESI was performed using borosilicate glass emitters (I.D. 0.68 mm O.D. 1.2 mm) which were prepared in-house using a P-1000 pipette puller (Sutter instruments) before coating with gold using a sputter coater (Agar Scientific Ltd.). Nano-ESI voltages typically ranged between 0.8-1.2 kV and were achieved without backing pressure.

## Mass spectrometry

Mass spectrometry was performed on an Orbitrap Eclipse mass spectrometer equipped with the HMR<sup>n</sup> option. The mass spectrometer was calibrated using FlexMix and the transfer capillary temperature was set to 275 °C. The ion routing multipole (IRM) was operated in standard (8 mTorr) for the majority of the analyses. High (20 mTorr) pressure mode for the analysis of the higher molecular weight proteins from the liver (>100 kDa) with the higher pressures in the IRM assisting in the trapping of large ions and the preservation of gas-phase non-covalent interactions. Source fragmentation was employed to assist in the desolvation of ions. When operating the instrument in the high-pressure mode the source CID compensation scaling factor was optimised concurrently with the source fragmentation to tune the m/z window transmitted. The orbitrap analyser was operated with a resolving power of 120,000 (standard pressure mode) or 7500 (high pressure mode) at m/z 200. For the brain tissue analysis, a resolving power of 240,000 at m/z 200 was used.

Proton transfer charge reduction (PTCR) MS<sup>n</sup> was performed using perfluoroperhydrophenanthrene (CAS 306-91-2) reagent anion within the high-pressure region of the linear ion trap. Reagent ion automatic gain control target was  $2 \times 10^5$ , the reaction time was varied between 1-5 ms. Injection time was 500-1500 ms. Isolation of ions was performed using the linear ion trap. The isolation windows for PTCR MS<sup>n</sup> experiments were between m/z 10-20.

Higher collision energy dissociation (HCD) was performed on the Eclipse MS for all proteins (except PPIA). Isolation was performed in the linear ion trap using a 15 m/z window. Normalised collision energies (NCE) used are stated with the fragmentation spectrum of each protein.

A Q-Exactive HF mass spectrometer was used for the MS<sup>n</sup> experiments of acetylated and non-acetylated PPIA. The orbitrap analyser was operated with a resolving power of 120,000. Isolation was performed in the quadrupole using a 5 m/z isolation window to isolate each of the PPIA proteoforms

## Protein database searching

ProSightPC 4.1 was used for database searching of fragment ions for top-down identification. The reference *Rattus Norvegicus* (UP000002494) proteome was downloaded from Uniprot.

## H&E staining

Post-laser capture tissue sections were stained using haematoxylin and eosin staining as described below (Table S1). Thaw mounted tissue sections were sequentially submerged in solvent baths containing the listed solvent for the proscribed length of time. Where repeat submersions were required a fresh solvent bath was used. Tissue was mounted in DPX and a cover slip was applied. 20x brightfield images were acquired using a Zeiss SlideScanner (Carl Zeiss Microscopy, Jena, Germany).

**Table S1:** Haematoxylin and eosin staining procedure.

| Solvent Bath                 | Time (min) | Repeat |
|------------------------------|------------|--------|
| Water                        | 2          | 1      |
| Haematoxylin Harris          | 4          | 0      |
| Water                        | 2          | 1      |
| Acid Alcoholc                | 0.5        | 0      |
| Water                        | 2          | 1      |
| Scott's tap Water Substitute | 0.5        | 0      |
| Water                        | 2          | 1      |
| Eosin                        | 1          | 0      |
| Water                        | 2          | 1      |
| Industrial denatured alcohol | 2          | 3      |
| Xylene                       | 2          | 2      |
| Mount in DPX                 | N/A        | N/A    |

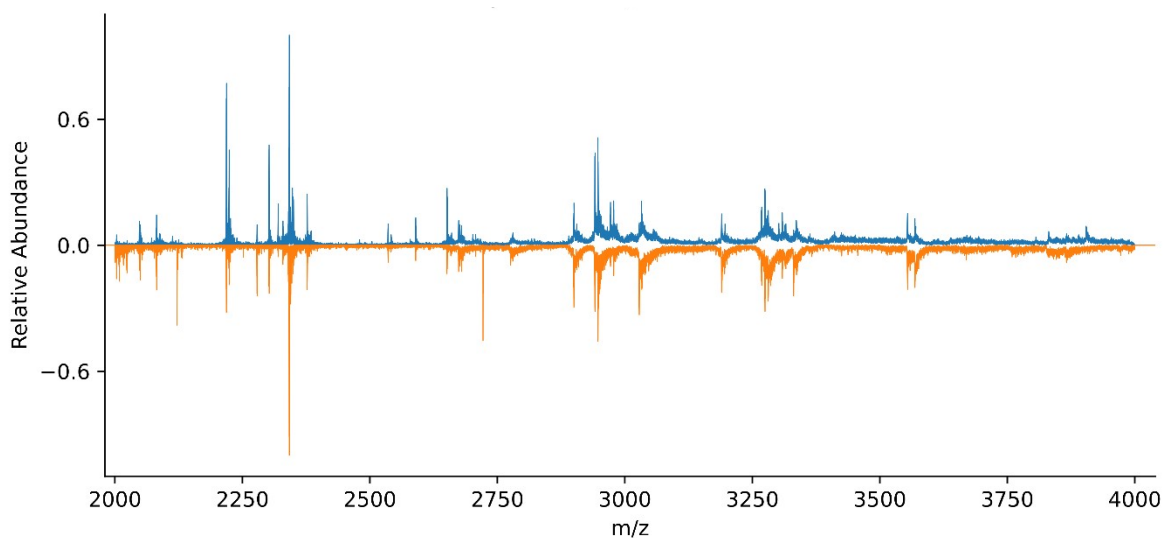

**Figure S1:** Representative mass spectra from a 200 μm x 200 μm x 10 μm LCMD extraction (blue trace) and a 100 μm x 100 μm x 10 μm LCMD extraction (orange trace). Each mass spectrum comprises ~60 scans.

**Table S2:** Proteins identified following top-down fragmentation from LCMD extractions of rat liver

| Protein | UniProt | PTMs                                              | Experimental mass | Theoretical Mass | Mass Difference (PPM) | Extraction Voxel ( $\mu\text{m}^3$ ) |
|---------|---------|---------------------------------------------------|-------------------|------------------|-----------------------|--------------------------------------|
| FABP1   | P02692  | N-Acetyl                                          | 14305.29          | 14305.31         | 1.40                  | 200 x 200 x 10                       |
| MUP     | P02761  | -signal peptide, Disulphide                       | 18716.33          | 18716.32         | 0.53                  | 100 x 100 x 10                       |
| PPIA    | P10111  | -Methionine                                       | 17731.89          | 17731.77         | 6.77                  | 200 x 200 x 10                       |
| PPIA    | P10111  | -Methionine, N-Acetyl                             | 17773.82          | 17773.79         | 1.69                  | 200 x 200 x 10                       |
| SOD1    | P07632  | -Methionine, N-Acetyl, Cu(II), Zn(II), Disulphide | 31871.12          | 31871.38         | 8.16                  | 200 x 200 x 10                       |
| RIDA    | P52759  | -Methionine, N-Acetyl                             | 14205.47          | 14205.53         | 4.22                  | 200 x 200 x 10                       |
| CA3     | P14141  | -Methionine, N-Acetyl, Zn                         | 29387.53          | 29387.07         | 15.65                 | 200 x 200 x 10<br>100 x 100 x 10     |
| RGN     | Q03336  | N-Acetyl                                          | 33279.55          | 33279.35         | 6.01                  | 100 x 100 x 10                       |

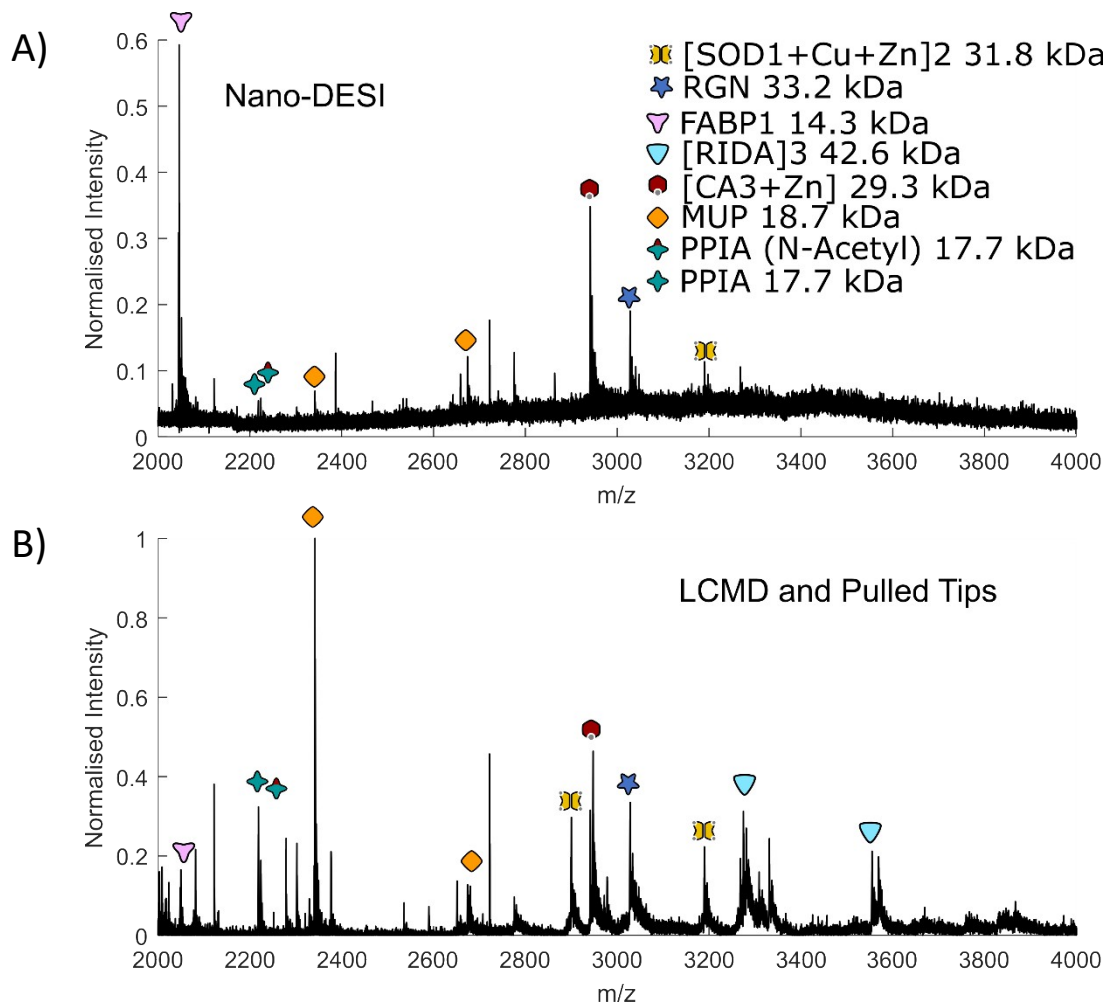

**Figure S2:** Comparison of mass spectra obtained using A) nano-DESI (line scan, acquired across 6 mins) and B) LCMD capture and nESI using pulled tips (data acquired for 6mins from a 100 x 100  $\mu\text{m}$  section) from 10  $\mu\text{m}$  thick liver tissue sections.

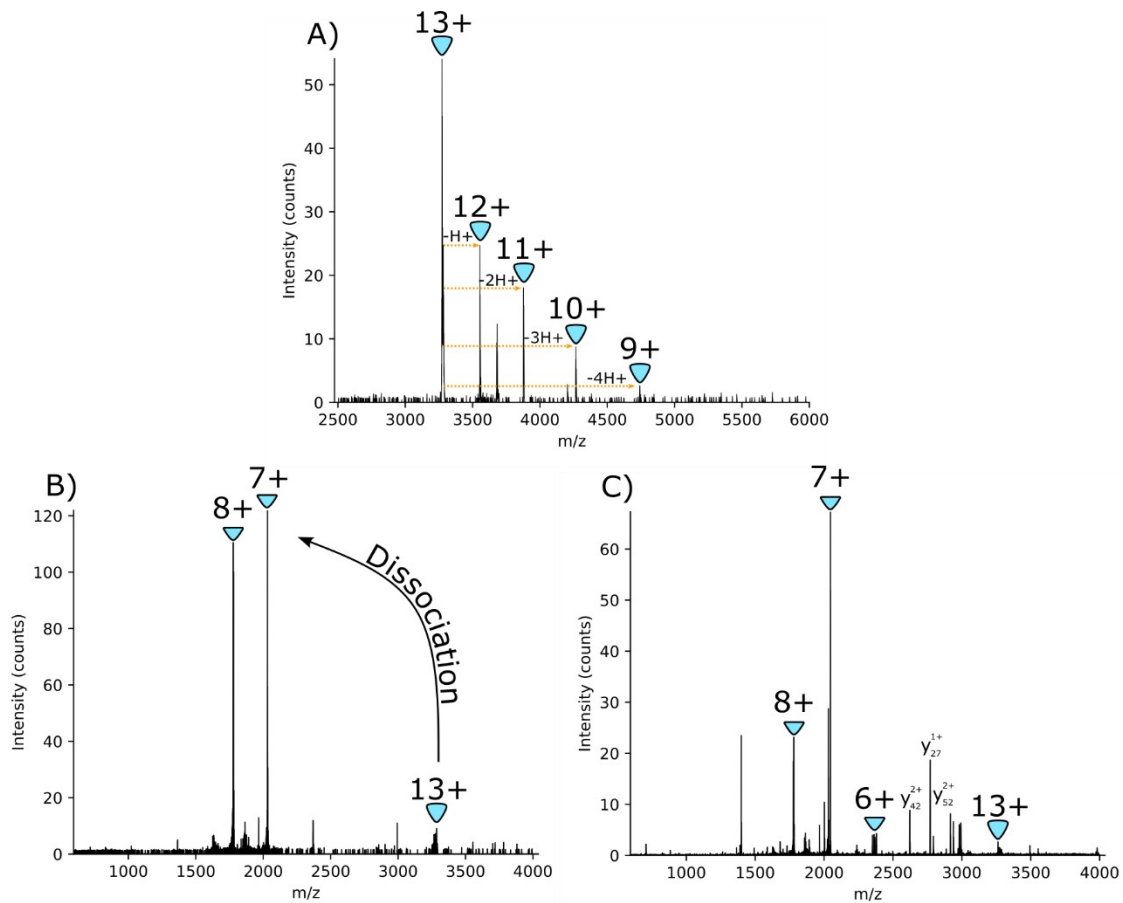

N **S** S I I R K V I S T S K A **P** A A I G A **Y** **I** S Q A **V** L 25  
 26 V D **R** T I Y V **S** G Q **I** G M D **P** S S G Q L V **P** G G V 50  
 51 A E E A K Q A L K N L G E I L K A A G C D F T N V 75  
 76 V K T T V L L **A** D **I** N D **F** G T V N E I **Y** K T Y F Q 100  
 101 G N L P A R A A Y Q V A A L P K G S R I E I E A I 125  
 126 A **V** Q G P F T T A G L C

**Figure S3:** Identification of the RIDA trimeric complex. A) PT-CR of the 13+ RIDA complex (isolated in the ion trap using a m/z 15 isolation window and PT-CR reaction time of 15 ms) produced a series of charge-reduced peaks which allowed for the determination of the intact complex mass using deconvolution. B) HCD of the 13+ RIDA complex showing dissociation of the complex into monomer subunits. C) HCD (NCE 35%) of the RIDA complex shows fragmentation of the monomer subunits to produce sequence fragments, data acquired for 6 mins. D) Sequence coverage of the RIDA. The red square indicates acetylation.



**Table S3:** Sequence ions observed for the RIDA monomer

| Identity | Experimental Mass (Da) | Theoretical Mass (Da) | Error (Da) | Error (PPM) |
|----------|------------------------|-----------------------|------------|-------------|
| b13      | 1412.8318              | 1412.8351             | -0.003     | -2.3        |
| b13      | 1412.8348              | 1412.8351             | 0.000      | -0.2        |
| b19      | 1893.1004              | 1893.1047             | -0.004     | -2.3        |
| b20      | 2056.1510              | 2056.1680             | -0.017     | -8.3        |
| b23      | 2342.2695              | 2342.2958             | -0.026     | -11.2       |
| b27      | 2768.5500              | 2768.5436             | 0.007      | 2.3         |
| b32      | 3400.8742              | 3400.9082             | -0.034     | -10.0       |
| b36      | 3786.0924              | 3786.1043             | -0.012     | -3.1        |
| b36      | 3786.1099              | 3786.1043             | 0.006      | 1.5         |
| b39      | 4089.1527              | 4089.1932             | -0.041     | -9.9        |
| b39      | 4089.1790              | 4089.1932             | -0.014     | -3.5        |
| b46      | 4757.5134              | 4757.5425             | -0.029     | -6.1        |
| b46      | 4757.5742              | 4757.5425             | 0.032      | 6.7         |
| b126     | 13215.8793             | 13216.0103            | -0.131     | -9.9        |
| y42      | 4480.3475              | 4480.3906             | -0.043     | -9.6        |
| y49      | 5240.7092              | 5240.7662             | -0.057     | -10.9       |
| y52      | 5582.8496              | 5582.9201             | -0.071     | -12.6       |
| y54      | 5769.0042              | 5768.9841             | 0.020      | 3.5         |
| y90      | 9447.9715              | 9447.9859             | -0.015     | -1.5        |

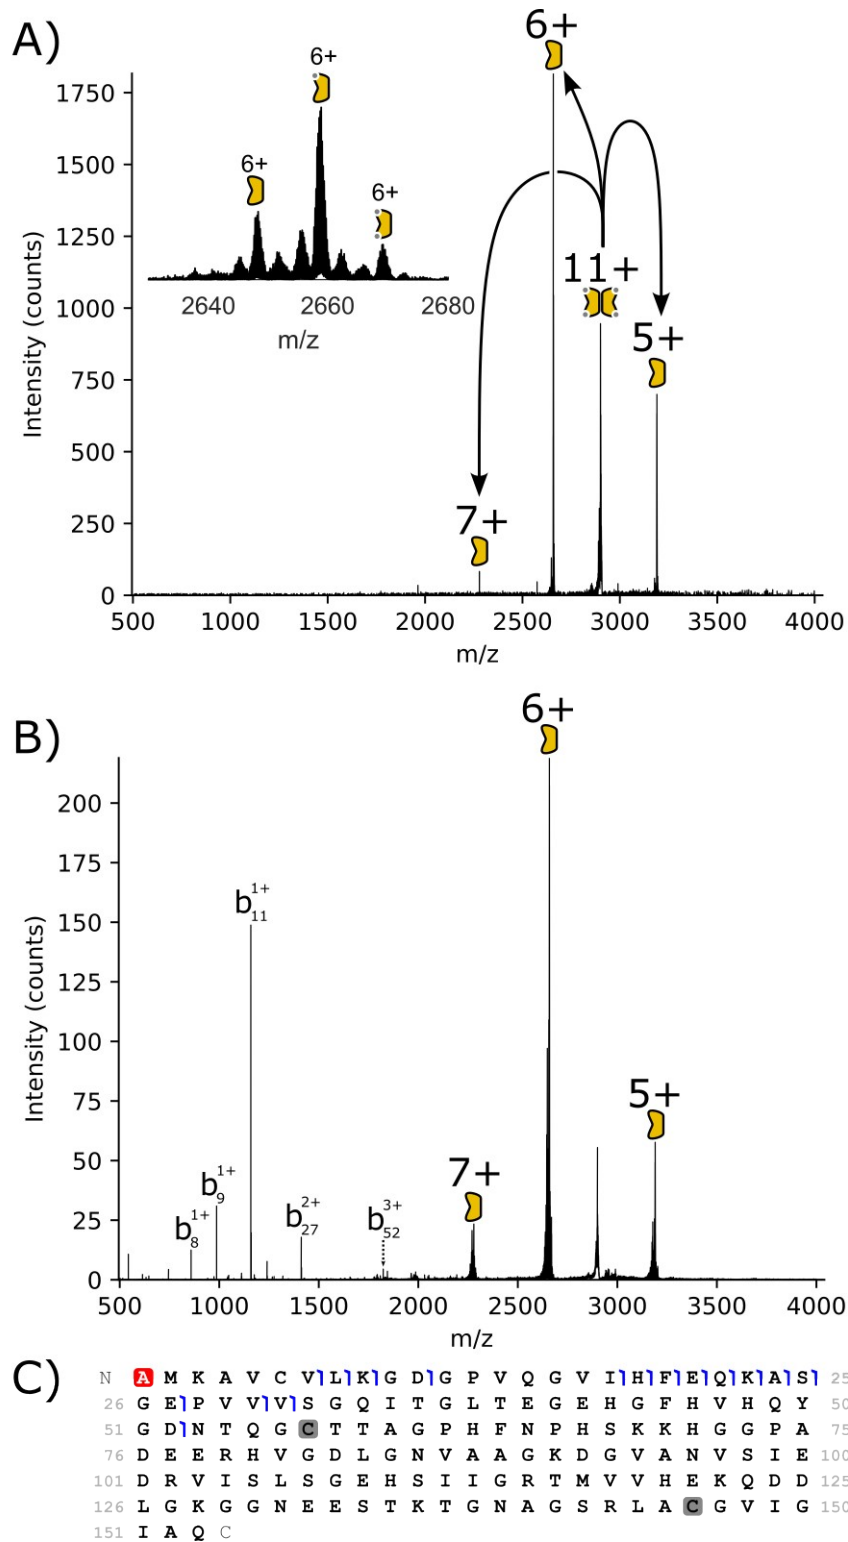

**Figure S4:** Identification of SOD1 dimer from a 200  $\mu\text{m}$  x 200  $\mu\text{m}$  x 10  $\mu\text{m}$  region LCMD extract. A) HCD (NCE 35%) of SOD1, inset shows the apo, mono- and dimetal-bound 6+ monomer subunits B) HCD (NCE 45%) of the SOD1, data acquired for 30 mins. C) Sequence coverage of the SOD1. The red square indicates N-acetylation and grey squares indicate disulphide bond.

**Table S4:** Sequence ions observed for the SOD1 monomer

| Identity | Experimental Mass<br>(Da) | Theoretical Mass<br>(Da) | Error<br>(Da) | Error<br>(PPM) |
|----------|---------------------------|--------------------------|---------------|----------------|
| b7       | 745.3695                  | 745.3735                 | 0.0040        | 5.4            |
| b8       | 858.4529                  | 858.4576                 | 0.0047        | 5.5            |
| b19      | 973.5160                  | 973.5212                 | 0.0052        | 5.3            |
| b9       | 986.5473                  | 986.5526                 | 0.0053        | 5.4            |
| b30      | 1039.8724                 | 1039.8790                | 0.0066        | 6.3            |
| b20      | 1047.0495                 | 1047.0554                | 0.0059        | 5.6            |
| b31      | 1072.8969                 | 1072.9018                | 0.0049        | 4.6            |
| b21      | 1111.5751                 | 1111.5767                | 0.0016        | 1.4            |
| b11      | 1158.5957                 | 1158.6010                | 0.0053        | 4.6            |
| b22      | 1175.5997                 | 1175.6059                | 0.0062        | 5.3            |
| b23      | 1239.6464                 | 1239.6534                | 0.0070        | 5.6            |
| b24      | 1275.1648                 | 1275.1720                | 0.0072        | 5.6            |
| b25      | 1318.6799                 | 1318.6880                | 0.0081        | 6.1            |
| b27      | 1411.7122                 | 1411.7200                | 0.0078        | 5.5            |
| b18      | 1808.9664                 | 1808.9761                | 0.0097        | 5.4            |
| b52      | 1822.8958                 | 1822.9048                | 0.0090        | 4.9            |

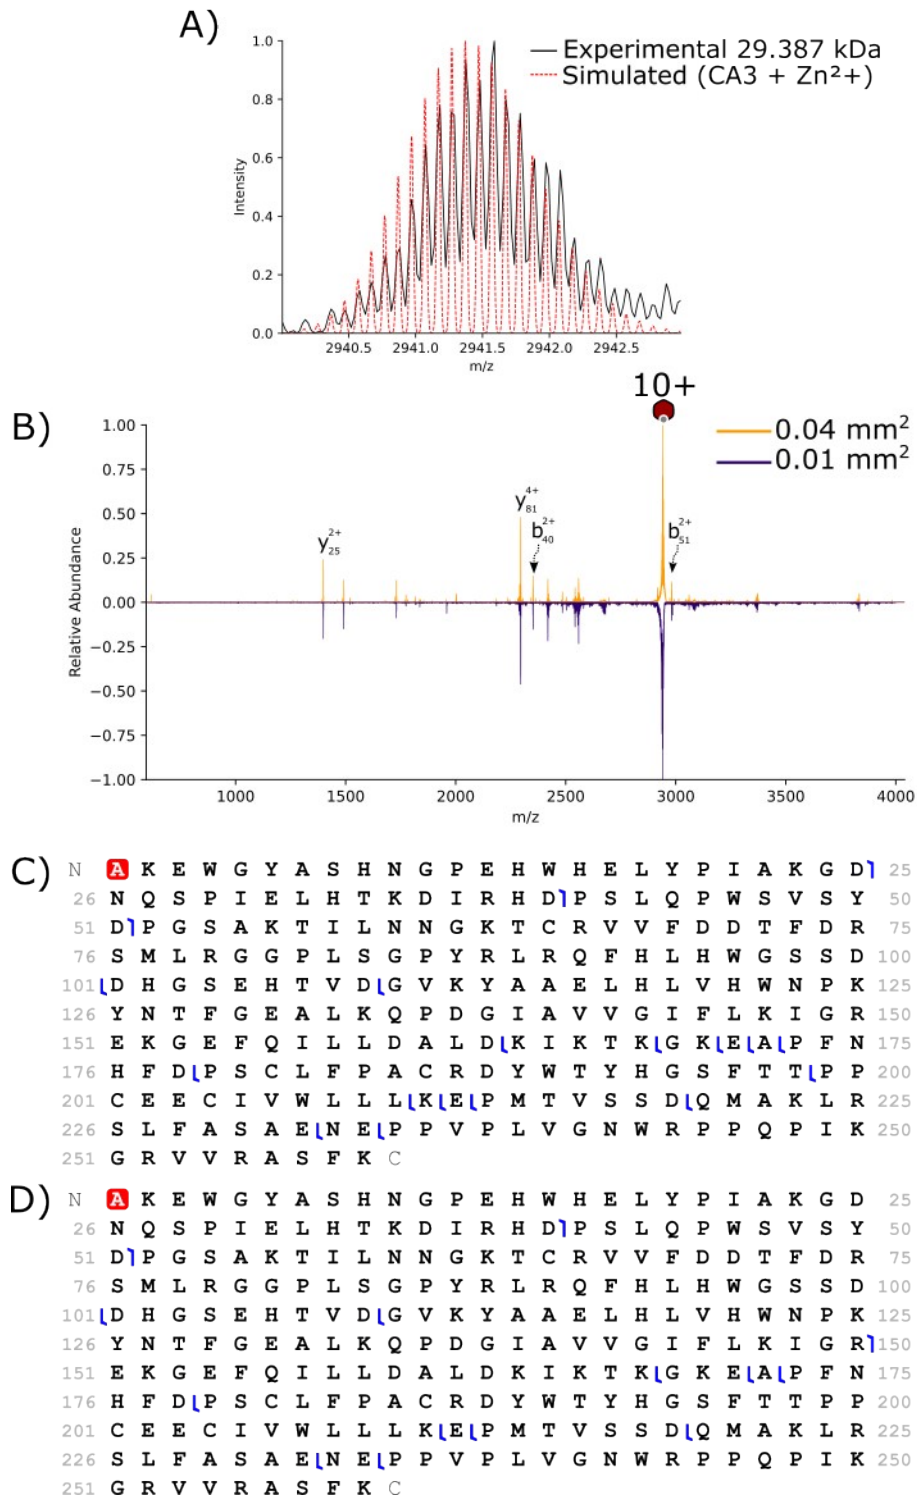

**Figure S5:** identification of Zn-bound CA3. A) Experimental (solid black line) and theoretical (red hashed line) isotope distributions for the 10+ charge state of the CA3 zinc (II) metal complex. B) Comparison between the HCD (NCE 40%) fragmentation spectrum of CA3 acquired for ROIs 200  $\mu\text{m}$  x 200  $\mu\text{m}$  x 10  $\mu\text{m}$  (top, orange line) and 100  $\mu\text{m}$  x 100  $\mu\text{m}$  x 10  $\mu\text{m}$  (bottom, purple line). Each mass spectrum was acquired for 6 minutes. C) Sequence coverage of the CA3 protein following HCD MS from a 200  $\mu\text{m}$  x 200  $\mu\text{m}$  x 10  $\mu\text{m}$  LCMD sample. D) Sequence coverage of the CA3 protein following HCD MS from a 100  $\mu\text{m}$  x 100  $\mu\text{m}$  x 10  $\mu\text{m}$  LCMD sample.

**Table S5:** Sequence ions observed for holo-CA3 complex from a 200  $\mu\text{m}$  x 200  $\mu\text{m}$  x10  $\mu\text{m}$  LCMD sample.

| Identity | Experimental Mass (Da) | Theoretical Mass (Da) | Error (Da) | Error (PPM) |
|----------|------------------------|-----------------------|------------|-------------|
| b25      | 2915.3236              | 2915.3415             | -0.0179    | -6.2        |
| b40      | 4699.1874              | 4699.2380             | -0.0506    | -10.8       |
| b51      | 5958.7537              | 5958.8203             | -0.0666    | -11.2       |
| y25      | 2794.6175              | 2794.6234             | -0.0059    | -2.1        |
| y27      | 3037.6942              | 3037.7089             | -0.0147    | -4.8        |
| y40      | 4470.4217              | 4470.4586             | -0.0369    | -8.2        |
| y40      | 4470.4311              | 4470.4586             | -0.0275    | -6.2        |
| y47      | 5187.7282              | 5187.7589             | -0.0307    | -5.9        |
| y48      | 5316.7668              | 5316.8015             | -0.0347    | -6.5        |
| y49      | 5444.9012              | 5444.8965             | 0.0047     | 0.9         |
| y61      | 6840.5625              | 6840.5895             | -0.0270    | -4.0        |
| y81      | 9173.4821              | 9173.5929             | -0.1108    | -12.1       |
| y81      | 9173.5880              | 9173.5929             | -0.0049    | -0.5        |
| y81      | 9173.6001              | 9173.5929             | 0.0072     | 0.8         |
| y87      | 9930.8078              | 9930.9113             | -0.1034    | -10.4       |
| y88      | 10001.9527             | 10001.9484            | 0.0044     | 0.4         |
| y89      | 10130.9109             | 10130.9910            | -0.0801    | -7.9        |
| y91      | 10316.0318             | 10316.1074            | -0.0756    | -7.3        |
| y96      | 10914.4755             | 10914.5240            | -0.0485    | -4.4        |
| y150     | 16916.6635             | 16916.7489            | -0.0854    | -5.1        |
| y159     | 17894.0316             | 17894.1328            | -0.1012    | -5.7        |

**Table S6:** Sequence ions for the holo CA3 from 100  $\mu\text{m}$  x 100  $\mu\text{m}$  x 10  $\mu\text{m}$  LCMD sample.

| Identity | Experimental Mass (Da) | Theoretical Mass (Da) | Error (Da) | Error (PPM) |
|----------|------------------------|-----------------------|------------|-------------|
| b150     | 2420.6786              | 2420.6366             | -0.042     | 17.4        |
| b40      | 2350.6179              | 2350.6263             | 0.0084     | 3.6         |
| b51      | 2980.4057              | 2980.4175             | 0.0118     | 4.0         |
| y150     | 2417.6754              | 2417.6857             | 0.0103     | 4.3         |
| y159     | 2557.2986              | 2557.3120             | 0.0134     | 5.2         |
| y25      | 1398.3130              | 1398.3190             | 0.006      | 4.3         |
| y27      | 1519.8557              | 1519.8618             | 0.0061     | 4.0         |
| y40      | 1491.1533              | 1491.1602             | 0.0069     | 4.6         |
| y47      | 1730.2523              | 1730.2603             | 0.008      | 4.6         |
| y48      | 1773.2657              | 1773.2745             | 0.0088     | 5.0         |
| y81      | 2294.3823              | 2294.4055             | 0.0232     | 10.1        |
| y87      | 2483.7042              | 2483.7351             | 0.0309     | 12.4        |
| y88      | 2501.5577              | 2501.4944             | -0.0633    | 25.3        |
| y91      | 2580.0150              | 2580.0342             | 0.0192     | 7.4         |

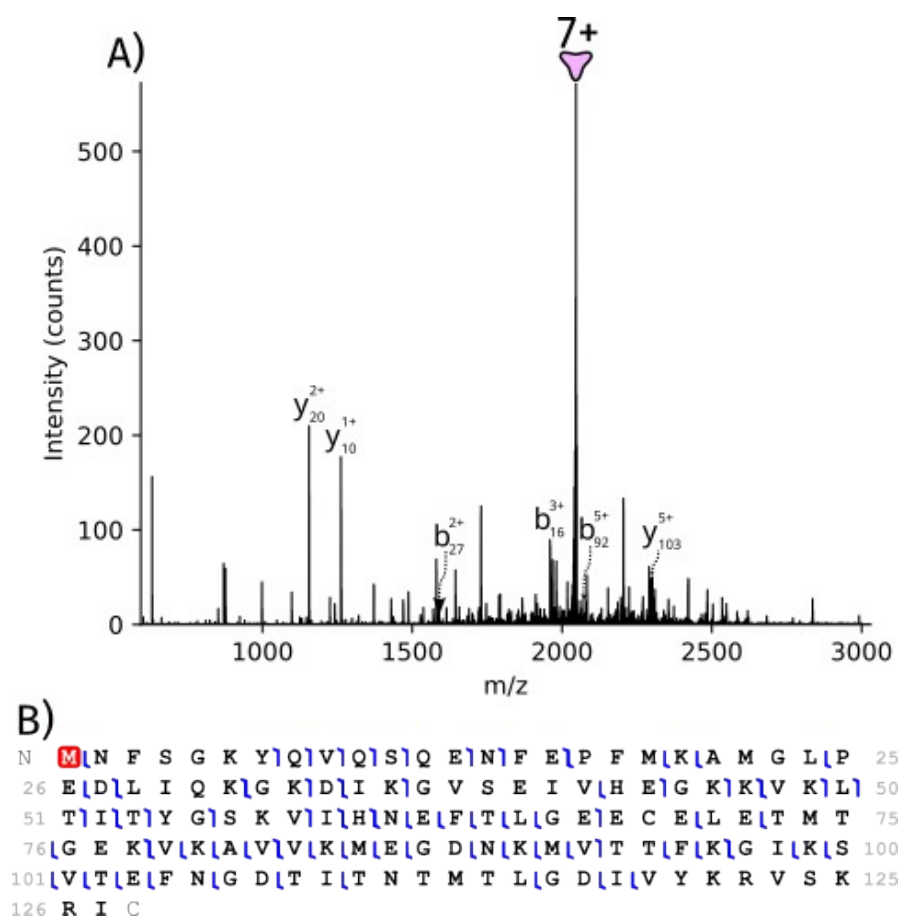

**Figure S6:** Identification of FABP1. A) HCD (40% NCE) of the 7+ charge state of FABP1, data acquired for 6 mins. B) Sequence coverage observed for FABP1. The red square indicates N-acetylation.

**Table S7:** Sequence ions observed for FABP1.

| Identity | Experimental Mass (Da) | Theoretical Mass (Da) | Error (Da) | Error(PPM) |
|----------|------------------------|-----------------------|------------|------------|
| b7       | 869.3747               | 869.3742              | 0.0006     | 0.6        |
| b8       | 997.4346               | 997.4328              | 0.0019     | 1.9        |
| b9       | 1096.5019              | 1096.5012             | 0.0008     | 0.7        |
| b10      | 1224.5625              | 1224.5597             | 0.0027     | 2.2        |
| b11      | 1311.5912              | 1311.5918             | -6E-04     | -0.4       |
| b13      | 1568.6899              | 1568.6929             | -0.003     | -1.9       |
| b14      | 1682.7362              | 1682.7359             | 0.0003     | 0.2        |
| b16      | 1958.8469              | 1958.8469             | 0          | 0.0        |
| b27      | 3175.3759              | 3175.4089             | -0.033     | -10.4      |
| b31      | 3657.7359              | 3657.7306             | 0.0054     | 1.5        |
| b33      | 3842.8277              | 3842.847              | -0.019     | -5.0       |
| b34      | 3957.8534              | 3957.8739             | -0.021     | -5.2       |

|     |            |            |        |       |
|-----|------------|------------|--------|-------|
| b36 | 4199.048   | 4199.0529  | -0.005 | -1.2  |
| b44 | 5049.4732  | 5049.4714  | 0.0018 | 0.4   |
| b46 | 5234.524   | 5234.5878  | -0.064 | -12.2 |
| b47 | 5362.6692  | 5362.6828  | -0.014 | -2.5  |
| b49 | 5589.7889  | 5589.8462  | -0.057 | -10.2 |
| b50 | 5702.9216  | 5702.9302  | -0.009 | -1.5  |
| b51 | 5803.9788  | 5803.9779  | 0.0009 | 0.2   |
| b52 | 5916.9864  | 5917.062   | -0.076 | -12.8 |
| b53 | 6018.1147  | 6018.1096  | 0.005  | 0.8   |
| b55 | 6238.151   | 6238.1944  | -0.044 | -7.0  |
| b58 | 6552.3501  | 6552.3898  | -0.04  | -6.1  |
| b59 | 6665.4378  | 6665.4739  | -0.036 | -5.4  |
| b60 | 6802.4757  | 6802.5328  | -0.057 | -8.4  |
| b67 | 7592.8111  | 7592.8825  | -0.072 | -9.4  |
| b78 | 8843.4198  | 8843.3984  | 0.0214 | 2.4   |
| b82 | 9240.6704  | 9240.6673  | 0.0031 | 0.3   |
| b92 | 10372.1841 | 10372.2089 | -0.025 | -2.4  |
| b96 | 10849.4381 | 10849.4677 | -0.03  | -2.7  |
| y9  | 1147.7164  | 1147.7189  | -0.003 | -2.2  |
| y10 | 1260.8005  | 1260.803   | -0.003 | -2.0  |
| y12 | 1432.8495  | 1432.8514  | -0.002 | -1.3  |
| y18 | 2094.161   | 2094.1619  | -9E-04 | -0.4  |
| y20 | 2308.2928  | 2308.2937  | -9E-04 | -0.4  |
| y22 | 2480.3317  | 2480.3421  | -0.01  | -4.2  |
| y24 | 2741.4568  | 2741.4534  | 0.0034 | 1.2   |
| y25 | 2870.5035  | 2870.496   | 0.0075 | 2.6   |
| y26 | 2971.5583  | 2971.5437  | 0.0147 | 4.9   |
| y27 | 3070.6195  | 3070.6121  | 0.0074 | 2.4   |
| y28 | 3157.6464  | 3157.6441  | 0.0023 | 0.7   |
| y29 | 3285.7058  | 3285.7391  | -0.033 | -10.1 |
| y31 | 3455.8126  | 3455.8446  | -0.032 | -9.3  |
| y32 | 3583.9481  | 3583.9396  | 0.0085 | 2.4   |
| y33 | 3730.9843  | 3731.008   | -0.024 | -6.3  |
| y36 | 4032.1742  | 4032.1717  | 0.0024 | 0.6   |
| y37 | 4163.224   | 4163.2122  | 0.0118 | 2.8   |
| y38 | 4291.2774  | 4291.3072  | -0.03  | -6.9  |
| y39 | 4405.3271  | 4405.3501  | -0.023 | -5.2  |
| y39 | 4405.3467  | 4405.3501  | -0.003 | -0.8  |
| y41 | 4577.3922  | 4577.3985  | -0.006 | -1.4  |
| y42 | 4706.4478  | 4706.4411  | 0.0067 | 1.4   |
| y43 | 4837.4268  | 4837.4816  | -0.055 | -11.3 |
| y43 | 4837.4531  | 4837.4816  | -0.029 | -5.9  |
| y44 | 4965.5689  | 4965.5766  | -0.008 | -1.5  |
| y45 | 5064.659   | 5064.645   | 0.014  | 2.8   |

|      |            |            |        |       |
|------|------------|------------|--------|-------|
| y46  | 5163.6727  | 5163.7134  | -0.041 | -7.9  |
| y47  | 5234.7592  | 5234.7505  | 0.0087 | 1.7   |
| y48  | 5362.8521  | 5362.8454  | 0.0067 | 1.2   |
| y49  | 5461.8645  | 5461.9139  | -0.049 | -9.0  |
| y52  | 5776.0448  | 5776.0729  | -0.028 | -4.9  |
| y55  | 6109.14    | 6109.2087  | -0.069 | -11.2 |
| y57  | 6351.3035  | 6351.3354  | -0.032 | -5.0  |
| y62  | 6898.4834  | 6898.4938  | -0.01  | -1.5  |
| y63  | 7011.5012  | 7011.5778  | -0.077 | -10.9 |
| y64  | 7112.6309  | 7112.6255  | 0.0054 | 0.8   |
| y65  | 7259.5861  | 7259.6939  | -0.108 | -14.9 |
| y66  | 7388.7136  | 7388.7365  | -0.023 | -3.1  |
| y67  | 7502.6724  | 7502.7795  | -0.107 | -14.3 |
| y68  | 7639.8072  | 7639.8384  | -0.031 | -4.1  |
| y75  | 8388.2004  | 8388.2503  | -0.05  | -6.0  |
| y80  | 8942.6706  | 8942.6295  | 0.0411 | 4.6   |
| y85  | 9521.8805  | 9521.9423  | -0.062 | -6.5  |
| y93  | 10347.3991 | 10347.4383 | -0.039 | -3.8  |
| y96  | 10647.5547 | 10647.5817 | -0.027 | -2.5  |
| y100 | 11129.8538 | 11129.9033 | -0.05  | -4.5  |
| y101 | 11244.8056 | 11244.9303 | -0.125 | -11.1 |
| y103 | 11471.0214 | 11471.0256 | -0.004 | -0.4  |
| y107 | 11843.1953 | 11843.2088 | -0.013 | -1.1  |
| y108 | 11971.2079 | 11971.3037 | -0.096 | -8.0  |
| y111 | 12346.4641 | 12346.4654 | -0.001 | -0.1  |
| y126 | 14132.236  | 14132.2612 | -0.025 | -1.8  |

---



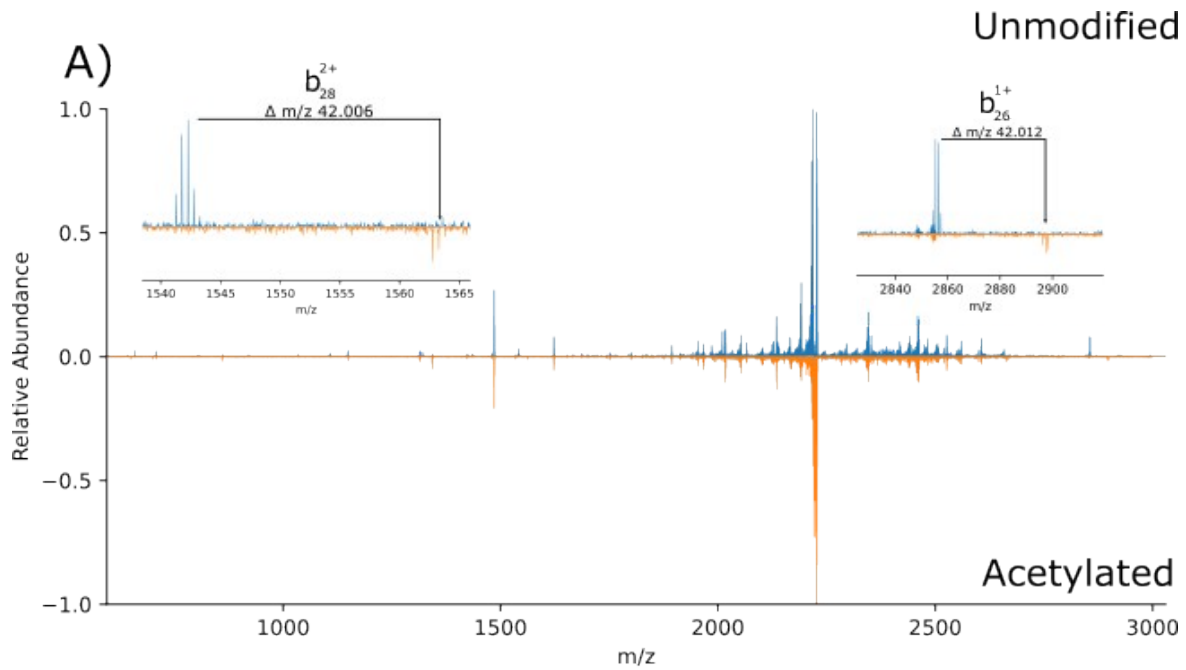

B)

```

N V N P T V F F D I T A D G E P L G R V C F E L F A 25
26 D K V P K T A E N F R A L S T G E K G F G Y K G S 50
51 S F H R I I P G F M C Q G G D F T R H N G T G G K 75
76 S I Y G E K F E D E N F I L K H T G P G I L S M A 100
101 N A G P N T N G S Q F F I C T A K T E W L D G K H 125
126 V V F G K V K E G M S I V E A M E R F G S R N G K 150
151 T S K K I T I S D C G Q L C

```

C)

```

N V N P T V F F D I T A D G E P L G R V C F E L F A 25
26 D K V P K T A E N F R A L S T G E K G F G Y K G S 50
51 S F H R I I P G F M C Q G G D F T R H N G T G G K 75
76 S I Y G E K F E D E N F I L K H T G P G I L S M A 100
101 N A G P N T N G S Q F F I C T A K T E W L D G K H 125
126 V V F G K V K E G M S I V E A M E R F G S R N G K 150
151 T S K K I T I S D C G Q L C

```

**Figure S7:** identification of proteoforms of PPIA. A) HCD (31% NCE (set to maximum charge of 5+)) of the 8+ charge state showing sequence fragments for both the unmodified (top, blue trace) and acetylated (bottom, orange trace) proteoforms of PPIA. Inset spectra show the 42 Da mass shift between key sequence fragments which reveal the presence of the modification. Each mass spectrum was acquired for 6 mins. B) Sequence coverage obtained for unmodified PPIA. C) Sequence coverage obtained for acetylated PPIA. The red square indicates acetylation

**Table S8:** Sequence ions observed for unmodified PPIA

| Identity | Experimental Mass (Da) | Theoretical Mass (Da) | Error (Da) | Error (PPM) |
|----------|------------------------|-----------------------|------------|-------------|
| b6       | 657.3504               | 657.3486              | 0.0018     | 2.7         |
| b8       | 919.4396               | 919.4439              | -0.0044    | -4.7        |
| b12      | 1319.6469              | 1319.6397             | 0.0072     | 5.4         |
| b26      | 2853.3391              | 2853.3683             | -0.0292    | -10.2       |
| b28      | 3080.5330              | 3080.5317             | 0.0014     | 0.4         |
| b54      | 5933.9634              | 5933.9627             | 0.0007     | 0.1         |
| b84      | 9176.4857              | 9176.4540             | 0.0318     | 3.5         |
| b90      | 9920.8794              | 9920.8710             | 0.0084     | 0.8         |
| b122     | 13280.3758             | 13280.4413            | -0.0655    | -4.9        |
| b126     | 13701.5806             | 13701.6850            | -0.1044    | -7.6        |
| b159     | 17312.4162             | 17312.5813            | -0.1652    | -9.5        |
| y21      | 2295.2142              | 2295.2117             | 0.0025     | 1.1         |
| y24      | 2626.3068              | 2626.3319             | -0.0251    | -9.6        |
| y30      | 3242.6393              | 3242.6210             | 0.0183     | 5.7         |
| y31      | 3371.6293              | 3371.6635             | -0.0343    | -10.2       |
| y32      | 3499.7330              | 3499.7585             | -0.0255    | -7.3        |
| y33      | 3598.7892              | 3598.8269             | -0.0377    | -10.5       |
| y34      | 3726.9205              | 3726.9219             | -0.0014    | -0.4        |
| y35      | 3783.9100              | 3783.9433             | -0.0333    | -8.8        |
| y36      | 3930.9765              | 3931.0117             | -0.0352    | -9.0        |
| y37      | 4030.0590              | 4030.0802             | -0.0212    | -5.3        |
| y38      | 4129.1206              | 4129.1486             | -0.0279    | -6.8        |
| y39      | 4266.2148              | 4266.2075             | 0.0073     | 1.7         |
| y41      | 4451.3144              | 4451.3239             | -0.0095    | -2.1        |
| y46      | 5095.5760              | 5095.6045             | -0.0285    | -5.6        |
| y47      | 5223.6537              | 5223.6994             | -0.0457    | -8.7        |
| y52      | 5758.8769              | 5758.9459             | -0.0690    | -12.0       |
| y53      | 5905.9998              | 5906.0143             | -0.0145    | -2.4        |
| y60      | 6604.2685              | 6604.3127             | -0.0442    | -6.7        |
| y61      | 6661.2972              | 6661.3341             | -0.0370    | -5.5        |
| y62      | 6732.3316              | 6732.3712             | -0.0396    | -5.9        |
| y64      | 6917.3746              | 6917.4513             | -0.0767    | -11.1       |
| y70      | 7515.7354              | 7515.7661             | -0.0308    | -4.1        |
| y71      | 7572.7394              | 7572.7876             | -0.0482    | -6.4        |
| y73      | 7810.8955              | 7810.8942             | 0.0013     | 0.2         |
| y79      | 8555.2872              | 8555.3112             | -0.0240    | -2.8        |
| y98      | 10679.1572             | 10679.3136            | -0.1564    | -14.6       |
| y137     | 14878.2937             | 14878.3969            | -0.1032    | -6.9        |
| y149     | 16225.9599             | 16226.0614            | -0.1015    | -6.3        |
| y151     | 16412.1500             | 16412.1254            | 0.0246     | 1.5         |
| y154     | 16699.1004             | 16699.2372            | -0.1368    | -8.2        |

|      |            |            |         |       |
|------|------------|------------|---------|-------|
| y155 | 16812.2779 | 16812.3212 | -0.0433 | -2.6  |
| y156 | 16927.1682 | 16927.3482 | -0.1800 | -10.6 |
| y158 | 17221.4313 | 17221.4850 | -0.0537 | -3.1  |
| y161 | 17518.5594 | 17518.6538 | -0.0944 | -5.4  |

**Table S9:** Sequence ions observed for N-acetylated PPIA.

| Identity | Experimental Mass (Da) | Theoretical Mass (Da) | Error (Da) | Error (PPM) |
|----------|------------------------|-----------------------|------------|-------------|
| b26      | 2895.3717              | 2895.3789             | -0.0072    | -2.5        |
| b28      | 3122.5124              | 3122.5422             | -0.0298    | -9.5        |
| b65      | 7094.398               | 7094.4621             | -0.0641    | -9.0        |
| b90      | 9962.8416              | 9962.8816             | -0.0399    | -4.0        |
| b150     | 16392.1128             | 16381.0475            | -0.1590    | -9.7        |
| b156     | 17039.2852             | 17039.4489            | -0.1637    | -9.6        |
| y21      | 2295.1935              | 2295.2117             | -0.0182    | -7.9        |
| y24      | 2626.3327              | 2626.3319             | 0.0008     | 0.3         |
| y30      | 3242.6397              | 3242.621              | 0.0187     | 5.8         |
| y31      | 3371.6483              | 3371.6635             | -0.0153    | -4.5        |
| y32      | 3499.7531              | 3499.7585             | -0.0054    | -1.5        |
| y33      | 3598.8101              | 3598.8269             | -0.0168    | -4.7        |
| y35      | 3783.9326              | 3783.9433             | -0.0107    | -2.8        |
| y36      | 3931.0239              | 3931.0117             | 0.0121     | 3.1         |
| y37      | 4030.0595              | 4030.0802             | -0.0207    | -5.1        |
| y38      | 4129.1211              | 4129.1486             | -0.0274    | -6.6        |
| y39      | 4266.1517              | 4266.2075             | -0.0558    | -13.1       |
| y41      | 4451.3149              | 4451.3239             | -0.0090    | -2.0        |
| y41      | 4451.334               | 4451.3239             | 0.0101     | 2.3         |
| y46      | 5095.5716              | 5095.6045             | -0.0329    | -6.5        |
| y62      | 6732.3753              | 6732.3712             | 0.0041     | 0.6         |
| y70      | 7515.6858              | 7515.7661             | -0.0803    | -10.7       |
| y70      | 7515.6948              | 7515.7661             | -0.0713    | -9.5        |
| y71      | 7572.7404              | 7572.7876             | -0.0472    | -6.2        |
| y73      | 7810.8036              | 7810.8942             | -0.0905    | -11.6       |
| y73      | 7810.8952              | 7810.8942             | 0.0010     | 0.1         |
| y149     | 16225.9619             | 16226.0614            | -0.0994    | -6.1        |
| y151     | 16412.052              | 16412.1254            | -0.0734    | -4.5        |
| y151     | 16412.0725             | 16412.1254            | -0.0529    | -3.2        |
| y155     | 16812.294              | 16812.3212            | -0.0273    | -1.6        |
| y158     | 17221.4336             | 17221.485             | -0.0514    | -3.0        |
| y161     | 17518.5616             | 17518.6538            | -0.0922    | -5.3        |

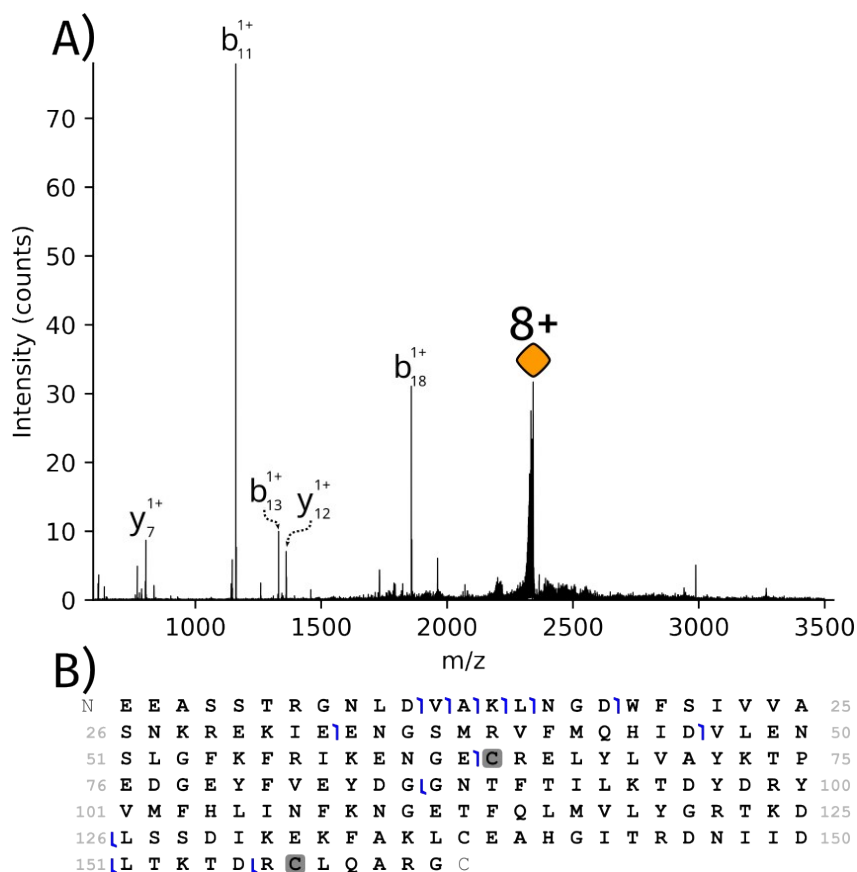

**Figure S8:** identification of MUP. A) HCD (NCE 40%) of the 8+ ions of MUP, data acquired for 15 mins. B) Sequence coverage obtained. The grey squares indicates a disulphide bond

**Table S10:** Sequence ions observed for MUP.

| Identity | Experimental Mass (Da) | Theoretical Mass (Da) | Error (Da) | Error (PPM) |
|----------|------------------------|-----------------------|------------|-------------|
| b15      | 786.4025               | 786.4048              | 0.002      | -2.9        |
| b11      | 1160.5141              | 1160.5178             | 0.004      | -3.2        |
| b12      | 1259.5818              | 1259.5862             | 0.004      | -3.5        |
| b13      | 1330.6187              | 1330.6233             | 0.005      | -3.5        |
| y12      | 1360.7146              | 1360.7240             | 0.009      | -6.9        |
| y7       | 802.4159               | 802.4226              | 0.007      | -8.3        |
| b14      | 1458.7131              | 1458.7183             | 0.005      | -3.6        |
| b46      | 1730.5181              | 1730.5226             | 0.005      | -2.6        |
| b63      | 1788.4014              | 1788.4030             | 0.002      | -0.9        |
| y76      | 1766.4952              | 1766.5083             | 0.013      | -7.4        |
| b33      | 1822.9338              | 1822.9370             | 0.003      | -1.8        |
| b18      | 1857.8874              | 1857.8937             | 0.006      | -3.4        |
| y37      | 2079.5750              | 2079.5873             | 0.012      | -5.9        |

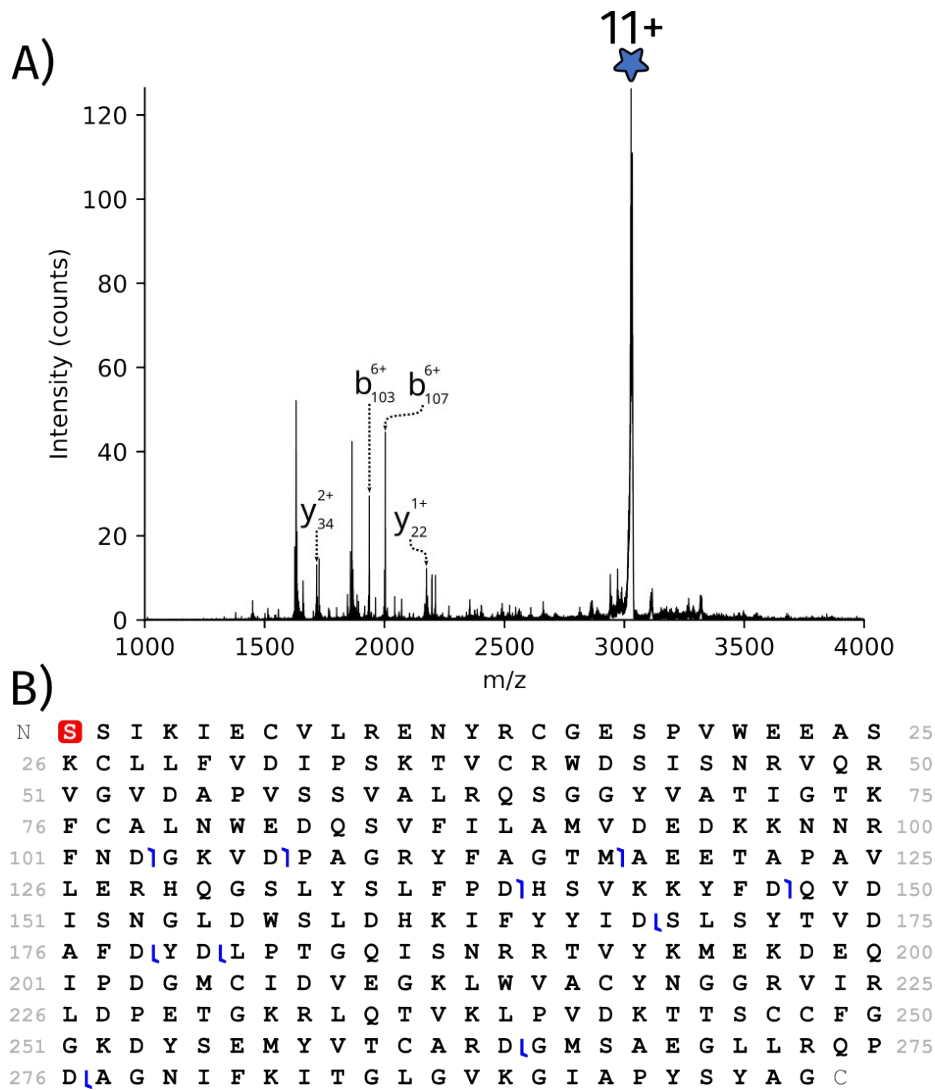

**Figure S9:** Identification of regucalcin (RGN). A) HCD of the 11+ charge state of RGN (NCE 42%), data acquired for 13 mins. B) Sequence coverage of the RGN1. The red square indicates N-acetylation.

**Table S11:** Sequence ions observed for RGN

| Identity | Experimental Mass (Da) | Theoretical Mass (Da) | Error (Da) | Error (PPM) |
|----------|------------------------|-----------------------|------------|-------------|
| b103     | 11607.6675             | 11607.7460            | 0.078      | -6.8        |
| b103     | 11607.6845             | 11607.7460            | 0.061      | -5.3        |
| b107     | 12006.8603             | 12006.9578            | 0.097      | -8.1        |
| b107     | 12006.9182             | 12006.9578            | 0.040      | -3.3        |
| b117     | 13058.6051             | 13058.4487            | -0.156     | 12.0        |
| b139     | 15469.6365             | 15469.6244            | -0.012     | 0.8         |
| b147     | 16474.0167             | 16474.1324            | 0.116      | -7.0        |
| y22      | 2196.1851              | 2196.1942             | 0.009      | -4.1        |
| y34      | 3450.7532              | 3450.7969             | 0.044      | -12.7       |
| y118     | 12906.2727             | 12906.4221            | 0.149      | -11.6       |
| y120     | 13184.4164             | 13184.5123            | 0.096      | -7.3        |
| y130     | 14282.9804             | 14282.9993            | 0.019      | -1.3        |

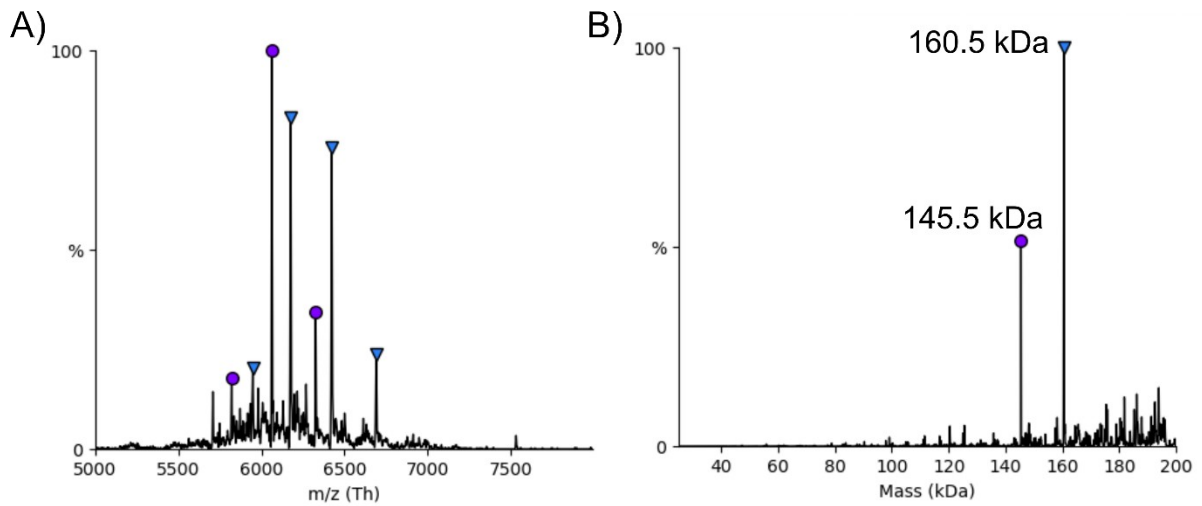

**Figure S10:** A) – Mass spectrum from LCMD extract of rat liver obtained with in-source collision energy =160 V; compensation scaling factor 16%, i.e., with mass spectrometer tuned for higher molecular weight species. B) Deconvoluted mass spectrum obtained following processing with UniDec software.

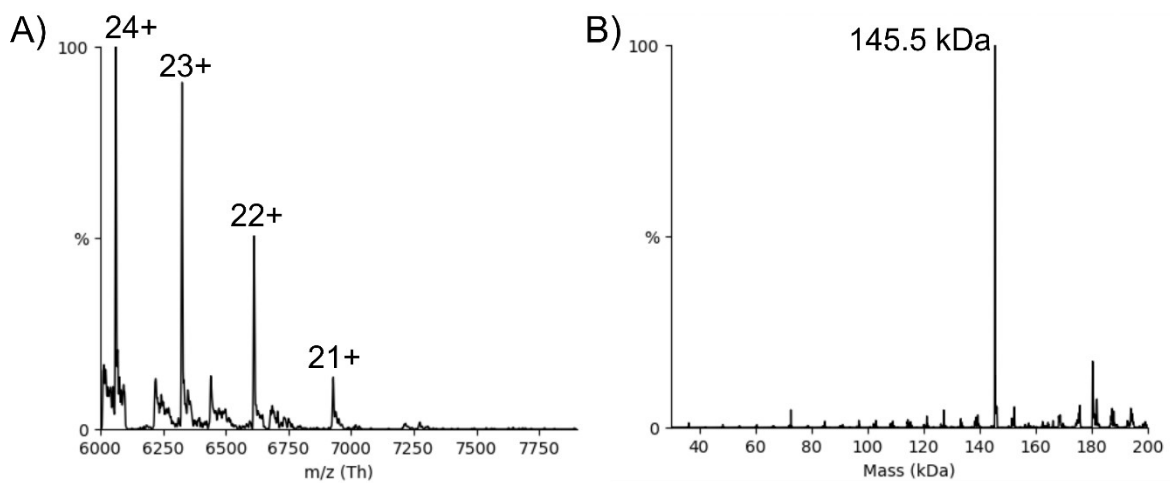

**Figure S11:** A) PTCD mass spectrum of the 24+ charge state of the LDHA monomer, B) Deconvolution of the PTCD spectrum using the UniDec software.

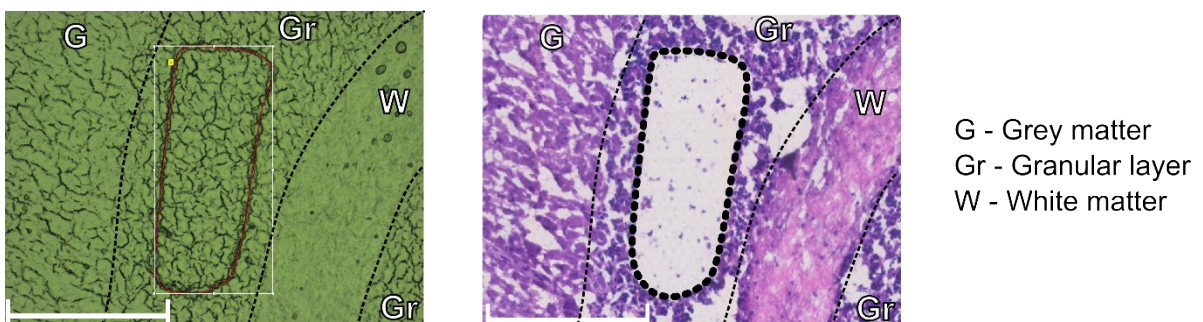

**Figure S12:** Optical images showing a region in the cerebellum of a rat brain A) before LCMD with the region in the granular layer defined to be captured and B) after LCMD where the tissue has been H&E stained. The three different regions (grey matter (G), white matter (W) and granular layer (Gr)) have been labelled. Scale bar = 200  $\mu$ m.

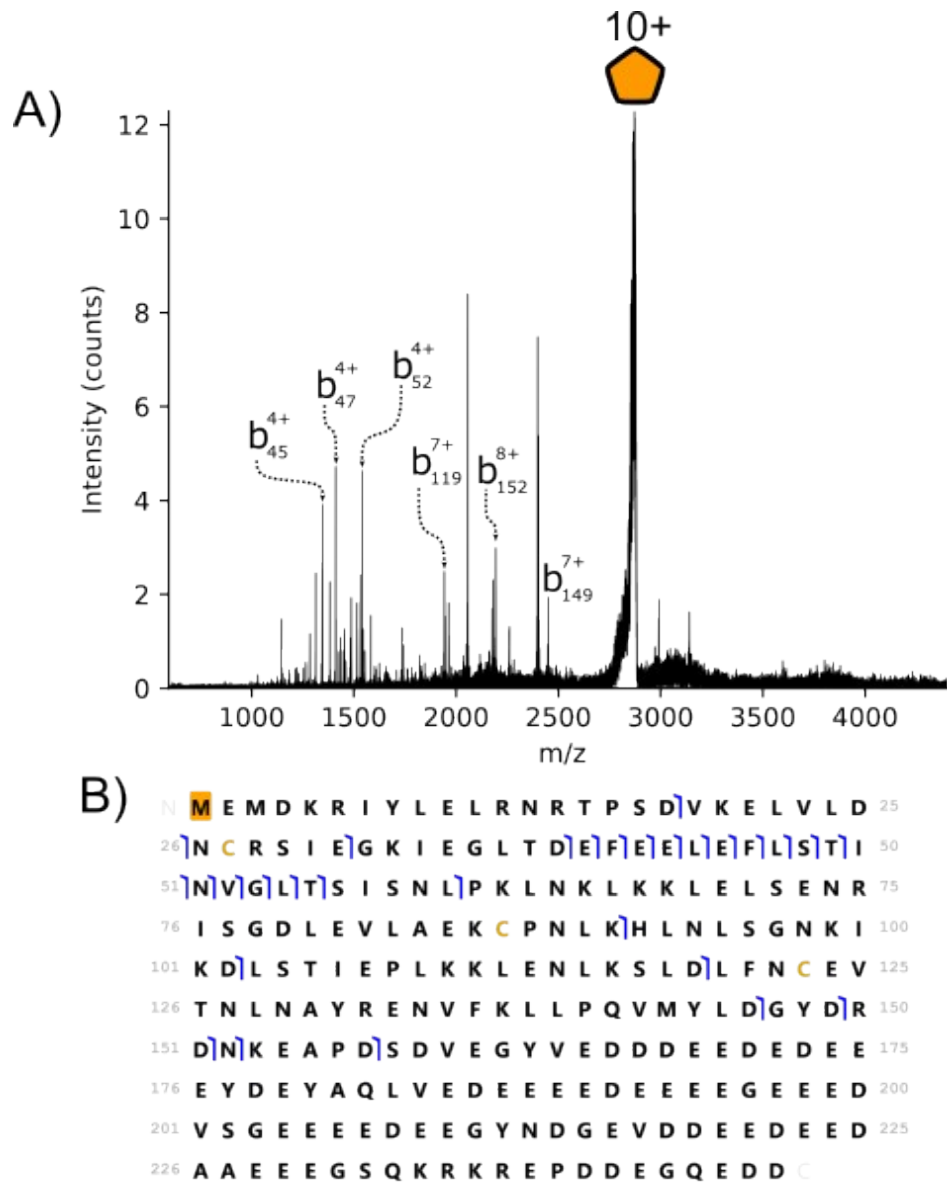

**Figure S13:** Identification of ANP32A. A) HCD fragmentation (NCE 40%) of the 10+ ions of ANP32A, data acquired for 20 mins B) Sequence coverage of ANP32A. The orange square indicates N-acetylation.

**Table S12:** Sequence ions observed for ANP32A.

| Identity | Experimental Mass (Da) | Theoretical Mass (Da) | Error (Da) | Error (PPM) |
|----------|------------------------|-----------------------|------------|-------------|
| b18      | 2290.123               | 2290.134              | -0.011     | -4.79902    |
| b25      | 3086.588               | 3086.604              | -0.0158    | -5.11558    |
| b31      | 3788.907               | 3788.923              | -0.0162    | -4.27224    |
| b39      | 4602.337               | 4602.346              | -0.0096    | -2.08453    |
| b40      | 4731.379               | 4731.396              | -0.0168    | -3.54775    |
| b41      | 4878.459               | 4878.464              | -0.0052    | -1.06504    |
| b42      | 5007.488               | 5007.507              | -0.0188    | -3.75137    |
| b43      | 5136.526               | 5136.55               | -0.024     | -4.66876    |
| b44      | 5249.611               | 5249.634              | -0.0224    | -4.26372    |
| b45      | 5378.653               | 5378.676              | -0.0232    | -4.31012    |
| b46      | 5525.714               | 5525.745              | -0.0308    | -5.56988    |
| b47      | 5638.79                | 5638.829              | -0.0392    | -6.94687    |
| b48      | 5725.831               | 5725.861              | -0.03      | -5.23573    |
| b49      | 5826.883               | 5826.908              | -0.0256    | -4.3904     |
| b50      | 5939.961               | 5939.993              | -0.0316    | -5.31629    |
| b51      | 6054.02                | 6054.036              | -0.0156    | -2.57509    |
| b52      | 6153.075               | 6153.104              | -0.0292    | -4.74249    |
| b53      | 6210.103               | 6210.126              | -0.0228    | -3.66906    |
| b54      | 6323.22                | 6323.21               | 0.0104     | 1.643695    |
| b55      | 6424.232               | 6424.257              | -0.0256    | -3.98242    |
| b60      | 6938.515               | 6938.532              | -0.0176    | -2.5351     |
| b91      | 10439.49               | 10439.52              | -0.0294    | -2.8146     |
| b102     | 11659.14               | 11659.19              | -0.0534    | -4.57772    |
| b119     | 13581.28               | 13581.31              | -0.028     | -2.0606     |
| b146     | 16808.86               | 16808.92              | -0.0595    | -3.53831    |
| b149     | 17143.98               | 17144.03              | -0.0539    | -3.14267    |
| b151     | 17415.1                | 17415.17              | -0.0632    | -3.62735    |
| b152     | 17529.12               | 17529.21              | -0.0896    | -5.10914    |
| b157     | 18069.42               | 18069.46              | -0.0408    | -2.25695    |



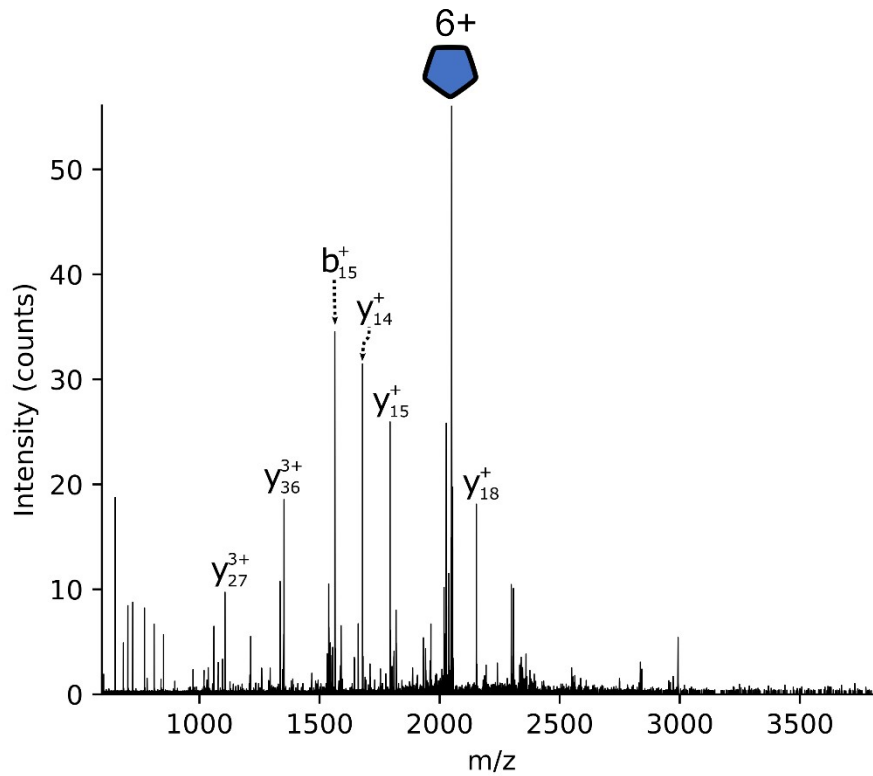

N **S** D A A V D T S S E I T T K D L K E K K E V V E E 25  
 26 A E N G R D A P A N G N A Q N E E N G E Q E A D N 50  
 51 E V D E E E E G G E E E E E E G D G E E E D 75  
 76 G D E D E E A E L A P T G K R V A E D D E D D D V E 100  
 101 T K K Q K K T D E D D C

**Figure S14:** identification of PTMA. A) HCD fragmentation (NCE 35%) of the 6+ ions of PTMA, data acquired for 5 mins B) Sequence coverage obtained for PTMA. The red square indicates N-acetylation.

**Table S13:** Sequence ions observed for PTMA

| Identity | Experimental Mass (Da) | Theoretical Mass (Da) | Error (Da) | Error (PPM) |
|----------|------------------------|-----------------------|------------|-------------|
| y9       | 1105.529               | 1105.532              | -0.0035    | -3.16303    |
| y11      | 1334.671               | 1334.675              | -0.0045    | -3.36908    |
| b15      | 1562.698               | 1562.702              | -0.0041    | -2.62198    |
| y13      | 1562.781               | 1562.786              | -0.005     | -3.19737    |
| y14      | 1677.806               | 1677.813              | -0.0066    | -3.93135    |
| y15      | 1792.835               | 1792.84               | -0.0052    | -2.89881    |
| y17      | 2036.904               | 2036.91               | -0.0054    | -2.64977    |
| y17      | 2036.911               | 2036.917              | -0.0062    | -3.04083    |
| b19      | 2061.019               | 2061.026              | -0.007     | -3.39307    |
| y18      | 2151.929               | 2151.936              | -0.0075    | -3.48361    |
| b20      | 2189.115               | 2189.121              | -0.0054    | -2.46449    |
| y27      | 3105.426               | 3105.437              | -0.011     | -3.5399     |
| y27      | 3105.434               | 3105.444              | -0.0099    | -3.18487    |
| y28      | 3176.471               | 3176.474              | -0.0032    | -1.00677    |
| y30      | 3376.545               | 3376.554              | -0.0084    | -2.48627    |
| b31      | 3416.647               | 3416.658              | -0.0104    | -3.04213    |
| y32      | 3634.633               | 3634.639              | -0.006     | -1.64988    |
| y32      | 3634.633               | 3634.646              | -0.0129    | -3.54625    |
| y34      | 3878.699               | 3878.708              | -0.009     | -2.31916    |
| y36      | 4050.744               | 4050.757              | -0.013     | -3.20769    |
| y36      | 4050.751               | 4050.764              | -0.0132    | -3.25623    |
| y41      | 4609.904               | 4609.933              | -0.0288    | -6.24467    |
| y41      | 4609.93                | 4609.94               | -0.0102    | -2.21117    |
| y58      | 6573.555               | 6573.585              | -0.0306    | -4.65287    |
